# Supplementary material for: GRASP55 restricts early-stage autophagy and regulates spatial organization of the early secretory network
Source: Oxford University Press journal article supplement (doi:10.1242/bio.058736), 2021-09-17
Supplement: bio058736supp.pdf [file bio058736supp.pdf]

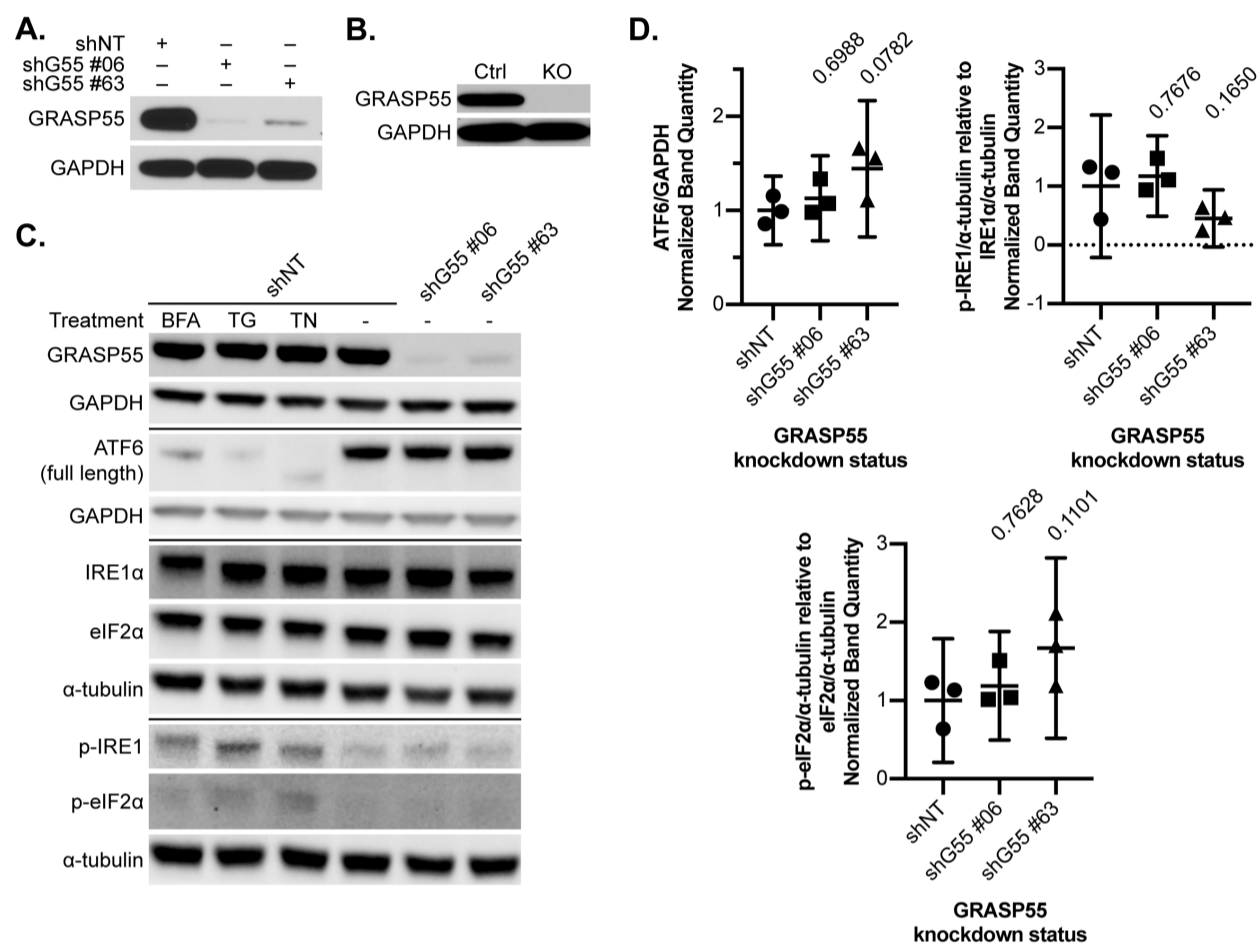

**Fig. S1. Effect of GRASP55 depletion on autophagy**

A. Lentiviral shRNA expression vectors targeting GRASP55 or a non-targeting control (shNT) were introduced into HEK293T cells and selected for stable incorporation with puromycin. Lysates were analyzed by immunoblot, and efficient knockdown was achieved by two separate hairpins (shG55 #06 and shG55 #63).

B. GRASP55 CRISPR-Cas9 knockout cells (KO) were generated using a GRASP55-targeting sgRNA. Control cells (Ctrl) were generated using a scramble sgRNA.

C. Lysates from HEK293Ts stably expressing GRASP55 shRNA or shNT control were analyzed by immunoblot for expression of ER stress markers. As a positive control for ER stress, shNT cells were treated for 5 hours with  $10 \mu\text{g ml}^{-1}$  brefeldin A (BFA),  $1 \mu\text{M}$  thapsigargin (TG), or  $5 \mu\text{g ml}^{-1}$  tunicamycin (TN). A representative immunoblot is shown. D. Band densitometry was performed on ER stress immunoblots, and band ratios were calculated as indicated, normalizing to mean control values. One-way ANOVA with Dunnett's multiple comparisons test was performed, and multiplicity adjusted p-values are shown.  $n = 3$  bioreplicates. Error bars: mean  $\pm$  95% confidence interval.

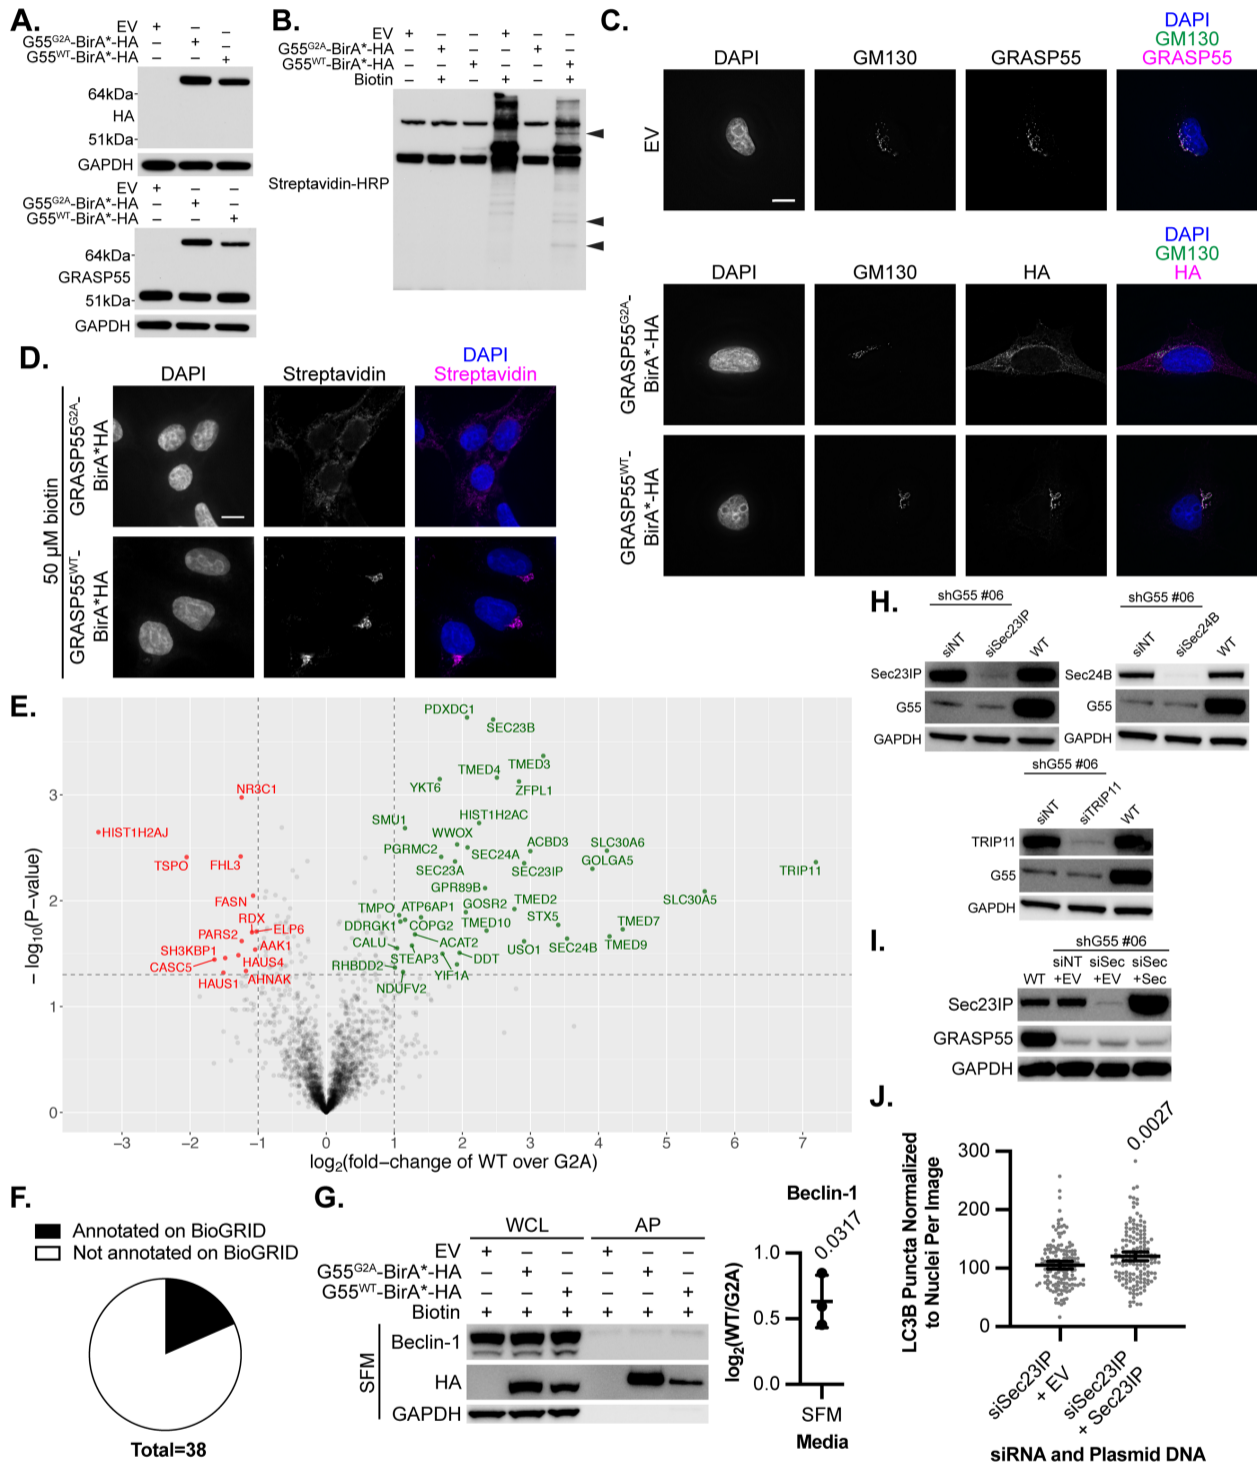

**Fig. S2. GRASP55 proximity-dependent biotinylation**

A. HEK293Ts were retrovirally transduced to stably express GRASP55 (G55)<sup>WT</sup>-BirA\*-HA, GRASP55 (G55)<sup>G2A</sup>-BirA\*-HA, or empty vector control (EV). Lysates were harvested from cells incubated with biotin, and expression of constructs was confirmed by immunoblot.

B. HEK293Ts stably expressing GRASP55<sup>WT</sup>-BirA\*-HA, GRASP55<sup>G2A</sup>-BirA\*-HA, or empty vector BioID constructs were incubated in media with (+) or without (-) 50  $\mu$ M biotin for 24 hours. Biotinylated proteins were affinity purified from lysates and analyzed by western blot using Streptavidin-HRP to detect biotinylated proteins. Arrows indicate bands distinct to the GRASP55<sup>WT</sup>-BirA\*-HA construct. A representative blot is shown.

C. HEK293Ts stably expressing GRASP55 BioID constructs or EV control were co-stained for the Golgi marker GM130, GRASP55, and/or HA tag (as indicated) along with DAPI. Representative images are shown. Scale bar = 10  $\mu$ m.

D. HEK293T cells stably expressing GRASP55 BioID constructs were incubated in media with 50  $\mu$ M biotin for 24 hours and co-stained with DAPI and fluorophore-conjugated Streptavidin. Representative images are shown. Scale bar = 10  $\mu$ m.

E. Volcano plot displaying all protein hits identified by GRASP55 proximity-dependent biotinylation. Label-free quantification intensity ratios in GRASP55<sup>WT</sup>-BirA\*-HA (WT) over GRASP55<sup>G2A</sup>-BirA\*-HA (G2A) samples were log<sub>2</sub>-transformed, and a Welch's two-tailed unpaired t-test was performed to assess statistical significance. Hits with  $\geq 2$ -fold enrichment in WT over G2A and p-value  $\leq 0.05$  are shown in green, while hits with  $\geq 2$ -fold enrichment in G2A over WT and p-value  $\leq 0.05$  are shown in red. n = 3 bioreplicates.

F. Top hits from the GRASP55 proximal interactome were compared to the list of GRASP55-interacting proteins annotated in the BioGRID protein database.

G. HEK293T cells stably expressing G55<sup>WT</sup>-BirA\*-HA (WT) or G55<sup>G2A</sup>-BirA\*-HA (G2A) GRASP55 BioID constructs or EV control were incubated with 50  $\mu$ M biotin for 24 hours in serum-free media (SFM). Whole cell lysates (WCL) were harvested and affinity purified (AP) for biotinylated proteins, and immunoblot analysis was performed as indicated. Representative immunoblots are shown. Band densitometry was performed on AP samples, and the WT to G2A band intensity ratios were log<sub>2</sub>-transformed. A one-sample two-tailed t-test was performed with a test value of 0, and p-value is shown. n = 3 bioreplicates. Error bars: mean  $\pm$  standard deviation.

H. siRNAs targeting Sec23IP, Sec24B, and TRIP11 were used to generate double-knockdown cells in HEK293Ts stably expressing shRNA against GRASP55 (shG55 #06). Immunoblots were performed to confirm knockdown alongside non-targeting (siNT) and wild-type (WT) controls. Representative immunoblots are shown.

I. siRNA targeting Sec23IP 3'UTR (siSec) and plasmid DNA containing Sec23IP cDNA (Sec) were co-transfected into GRASP55 stable knockdown cells (shG55 #06). Immunoblots were performed to confirm expression using WT, siNT, and EV controls. Representative immunoblots are shown.

J. GRASP55 knockdown HEK293T cells (shG55 #06) were transiently depleted of Sec23IP using individual siRNA targeted against the 3'UTR and co-transfected with EV or Sec23IP cDNA. Cells were incubated in EBSS with 100 nM bafilomycin A1 for 60 minutes and stained for LC3B along with DAPI. LC3B puncta were counted and normalized to the number of DAPI-stained nuclei on a per-image basis. Welch's two-tailed unpaired t-test was performed, and p-value is shown. n = 150 images per group pooled from 3 replicates. Error bars: mean  $\pm$  95% confidence interval.

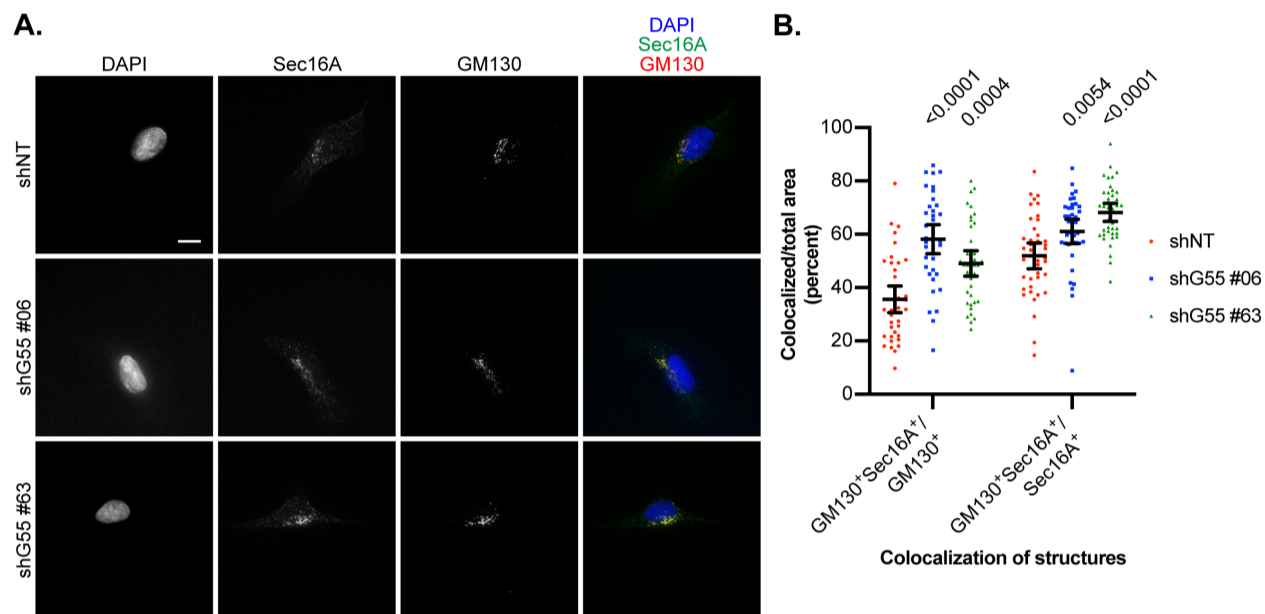

**Fig. S3. Effect of GRASP55 depletion on the ER-Golgi interface**

A. GRASP55 stable knockdown (shG55 #06 and #63) and non-targeting control (shNT) cells were stained for GM130 and Sec16A along with DAPI. Representative images are shown. Scale bar = 10  $\mu$ m.

B. The areas covered by GM130 and Sec16A, including overlapping regions, were measured using ImageJ software. The ratio of overlapping region to individual area of a structure was calculated and reported as a percent. One-way ANOVA with Dunnett's multiple comparisons test was performed for each colocalization group, and multiplicity adjusted p-values are shown.  $n = 40$  shNT cells, 39 shG55 #06 cells, and 40 shG55 #63 cells, pooled from two experiments. Error bars: mean  $\pm$  95% confidence interval.

**Table S1.** GRASP55 proximity-dependent biotinylation Proximity-dependent biotinylation was utilized to identify a GRASP55 proximal interactome. For each identity, the protein name, gene name, and primary corresponding UniProt ID are shown, along with the log<sub>2</sub>-transformed intensity ratio of GRASP55<sup>WT</sup>-BirA\*-HA (WT) over GRASP55<sup>G2A</sup>- BirA\*-HA (G2A) samples and p-value (calculated by Welch's two-tailed unpaired t-test).

| Protein name                                                  | Gene Name | UniProt ID | Log <sub>2</sub> (WT/G2A) | p-value |
|---------------------------------------------------------------|-----------|------------|---------------------------|---------|
| Thyroid receptor-interacting protein 11                       | TRIP11    | Q15643     | 7.19194                   | 0.00433 |
| Zinc transporter 5                                            | SLC30A5   | Q8TAD4     | 5.55905                   | 0.00817 |
| Transmembrane emp24 domain-containing protein 7               | TMED7     | Q9Y3B3     | 4.35477                   | 0.01864 |
| Transmembrane emp24 domain-containing protein 9               | TMED9     | Q9BVK6     | 4.16124                   | 0.02173 |
| Zinc transporter 6                                            | SLC30A6   | Q6NXT4     | 4.12286                   | 0.00337 |
| Golgin subfamily A member 5                                   | GOLGA5    | Q8TBA6     | 3.90961                   | 0.00500 |
| Protein transport protein Sec24B                              | SEC24B    | O95487     | 3.53728                   | 0.02284 |
| Syntaxin-5                                                    | STX5      | Q13190     | 3.40771                   | 0.01695 |
| Transmembrane emp24 domain-containing protein 3               | TMED3     | Q9Y3Q3     | 3.18841                   | 0.00043 |
| Golgi resident protein GCP60                                  | ACBD3     | Q9H3P7     | 2.99792                   | 0.00341 |
| SEC23-interacting protein                                     | SEC23IP   | Q9Y6Y8     | 2.90721                   | 0.00443 |
| General vesicular transport factor p115                       | USO1      | O60763     | 2.90585                   | 0.02420 |
| Zinc finger protein-like 1                                    | ZFPL1     | O95159     | 2.83137                   | 0.00075 |
| Transmembrane emp24 domain-containing protein 2               | TMED2     | Q15363     | 2.76387                   | 0.01200 |
| Transmembrane emp24 domain-containing protein 4               | TMED4     | Q7Z7H5     | 2.50645                   | 0.00069 |
| Protein transport protein Sec23B                              | SEC23B    | Q15437     | 2.45113                   | 0.00019 |
| Transmembrane emp24 domain-containing protein 10              | TMED10    | P49755     | 2.35469                   | 0.01919 |
| Golgi pH regulator B                                          | GPR89B    | P0CG08     | 2.33330                   | 0.00762 |
| Histone H2A type 1-C                                          | HIST1H2AC | Q93077     | 2.24515                   | 0.00185 |
| Protein transport protein Sec24A                              | SEC24A    | O95486     | 2.07547                   | 0.00314 |
| Pyridoxal-dependent decarboxylase domain-containing protein 1 | PDXDC1    | Q6P996     | 2.06787                   | 0.00019 |
| Golgi SNAP receptor complex member 2                          | GOSR2     | O14653     | 2.05011                   | 0.01285 |
| D-dopachrome decarboxylase                                    | DDT       | P30046     | 1.95804                   | 0.03110 |
| WW domain-containing oxidoreductase                           | WWOX      | Q9NZC7     | 1.92233                   | 0.00295 |
| Protein transport protein Sec23A                              | SEC23A    | Q15436     | 1.89144                   | 0.00426 |
| Protein YIF1A                                                 | YIF1A     | O95070     | 1.70701                   | 0.03173 |



| <b>Protein name</b>                                                             | <b>Gene Name</b> | <b>UniProt ID</b> | <b>Log<sub>2</sub> (WT/G2A)</b> | <b>p-value</b> |
|---------------------------------------------------------------------------------|------------------|-------------------|---------------------------------|----------------|
| Membrane-associated progesterone receptor component 2                           | PGRMC2           | O15173            | 1.68878                         | 0.00386        |
| Synaptobrevin homolog YKT6                                                      | YKT6             | O15498            | 1.66690                         | 0.00071        |
| V-type proton ATPase subunit S1                                                 | ATP6AP1          | Q15904            | 1.39232                         | 0.01435        |
| Acetyl-CoA acetyltransferase, cytosolic                                         | ACAT2            | Q9BWD1            | 1.30291                         | 0.02083        |
| Metalloreductase STEAP3                                                         | STEAP3           | Q658P3            | 1.25844                         | 0.02656        |
| Coatomer subunit gamma-2                                                        | COPG2            | Q9UBF2            | 1.15837                         | 0.01516        |
| WD40 repeat-containing protein SMU1                                             | SMU1             | Q2TAY7            | 1.15667                         | 0.00207        |
| NADH dehydrogenase [ubiquinone] flavoprotein 2, mitochondrial                   | NDUFV2           | P19404            | 1.12821                         | 0.04721        |
| DDRGK domain-containing protein 1                                               | DDRGK1           | Q96HY6            | 1.08897                         | 0.01576        |
| Lamina-associated polypeptide 2, isoforms beta/gamma; Thymopoietin; Thymopentin | TMPO             | P42167            | 1.07083                         | 0.01372        |
| Calumenin                                                                       | CALU             | O43852            | 1.04131                         | 0.02810        |
| Rhomboid domain-containing protein 2                                            | RHBDD2           | Q6NTF9            | 1.00934                         | 0.04286        |

**Table S2. Autophagy-related proteins detected by GRASP55 BioID**

Selected autophagy-related proteins that were biotinylated by GRASP55 BioID constructs are shown. For each identity, the protein name, gene name, and primary corresponding UniProt ID are shown, along with the  $\log_2$ -transformed intensity ratio of GRASP55<sup>WT</sup>-BirA\*-HA (WT) over GRASP55<sup>G2A</sup>-BirA\*-HA (G2A) samples and p-value (calculated by Welch's two-tailed unpaired t-test).

| <b>Protein name</b>                                     | <b>Gene Name</b> | <b>UniProt ID</b> | <b>Log<sub>2</sub> (WT/G2A)</b> | <b>p-value</b> |
|---------------------------------------------------------|------------------|-------------------|---------------------------------|----------------|
| Sequestosome-1                                          | SQSTM1           | Q13501            | 0.15123                         | 0.60510        |
| Autophagy-related protein 9A                            | ATG9A            | Q7Z3C6            | 0.05105                         | 0.80999        |
| Autophagy-related protein 2 homolog B                   | ATG2B            | Q96BY7            | -0.61061                        | 0.04154        |
| Ubiquitin-like-conjugating enzyme ATG3                  | ATG3             | Q9NT62            | -0.74869                        | 0.10453        |
| WD repeat domain phosphoinositide-interacting protein 2 | WIPI2            | Q9Y4P8            | -0.86149                        | 0.13794        |
